# Supplementary material for: Root zone soil moisture in over 25 % of global land permanently beyond pre-industrial variability as early as 2050
Source: Copernicus journal article supplement (doi:10.5194/egusphere-2022-971), 2022-11-29
Supplement: Supplementary file [file egusphere-2022-971-AC1-supplement.pdf]

# Responses to all referees

This document contains the initial responses to all three referees. For some issues we have already proposed new analyses or updated text. Some other issues remain to be fully addressed, which is indicated below, and will receive an updated response alongside a revised manuscript.

We cite the referee comments in black. We added numbers for clarity purposes.

Our responses are in blue

## Content

[Response to Referee 1](#)

[Response to Referee 2 Wolfgang Wagner](#)

[Response to Referee 3](#)

[References \(that were not yet part of the manuscript\)](#)

## Response to Referee 1

“This study analyzed the future changes of the total soil moisture for the four different SSP scenarios. Using 14 ESM in CMIP6, deviation of total soil moisture from the PiControl scenario, permanent departures beyond the Picontrol variability and the time of emergence of those permanent departures are evaluated. Also, this study analyzed regional total soil moisture variability results according to the SSP scenarios in detail and presents the robust results of multi ensemble ESM in some regions like Mediterranean in terms of remarkable dry departure. Regions such as Northern Africa, South-Eastern South America and Southern Asia resulted in considerable wet departures. In many regions, these dry and wet intensities displayed to intensify as the effects of global warming. The priority of this study is to quantitatively organize the regional results according to the SSP future scenarios over global domain. However, as mentioned in chapter 3.5, there are many limitations in relation to the analysis of future SSP scenario results, and additional explanations on the results and data seem to be needed. Detailed comments are below.”

We thank the referee for a thorough review and constructive comments. We hope to satisfy the referee by adding the requested additional explanations in a revised manuscript.

### Major Comments:

1. Regarding the title, this study expressed root zone soil moisture in over 25% of global land permanently beyond pre-industrial variability as early as 2050. However, in practice, the analysis of total soil moisture is the main focusing variable in ESM in CMIP6, and since the percentage value differs depending on the scenario, it is necessary to modify the tilt (title?) to reflect these aspects.

Regarding the aspect of total vs. root zone soil moisture, we believe this is sufficiently explained in section 2.1 Data: “The total soil moisture content is the mass of water in all phases and in all soil layers. Whereas the green water planetary boundary definition is based on root zone soil moisture (Wang-Erlandsson et al., 2022), this was not explicitly available from most ESMs in CMIP6. Depending on the model configuration the total soil moisture may coincide with root zone soil moisture in most areas (e.g., van Oorschot et al., 2021). In any case, we deem it logical to assume that any changes occurring in the total soil moisture in fact are occurring in the hydrological active zone, which is the zone in which plant roots are active (e.g., Feddes et al., 2001; Fan et al., 2017; Singh et al., 2020), and, therefore, we focus on analyzing the absolute and not the relative changes in total soil moisture.”

Regarding the aspect of different change depending on the scenario, we intended this to be read as something which could happen without climate policy, however, this was apparently not intuitive for a reader, hence we decided to follow the referee's suggestion and propose to change the title to:

"Root zone soil moisture in over 25% of global land permanently beyond pre-industrial variability as early as 2050 without climate policy".

The 25% land area with departure occurs in the SSP3-7.0 scenario in which there is no climate policy implemented. To the sentence "The SSPs used in this study are SSP1-2.6 (+2.6 W m<sup>-2</sup>; low GHGs emissions), SSP2-4.5 (+4.5 W m<sup>-2</sup>; intermediate GHGs emissions), SSP3-7.0 (+7.0 W m<sup>-2</sup>; high GHGs emissions), and SSP5-8.5 (+8.5 W m<sup>-2</sup>; very high GHGs emissions) (Riahi et al., 2017).", we will add: "Note that SSP2-4.5 is roughly on the current pathway of emission reductions and SSP3-7.0 is an average 'no climate policy'-scenario (Hausfather and Peters, 2020)"

2. As mentioned in the limitations part of this text, ESM have uncertainties in certain regions. For example, in this study, North Africa like SAH desert regions are historically very dry but tend to show wet departures in the future. It comes out as a wet case because the 95% percentile wet departure threshold is low in very dry regions like desert, it seems more necessary to reflect the climatological soil moisture distribution and land type since the consequences that desert areas becomes wet are considered unacceptable.

We agree that a wet departure in a very dry region such as the Sahara may be a small increase in absolute terms due to the low threshold, but departure does happen indeed. Since we are analyzing comparisons of soil moisture with the baseline, the conclusion is in relative terms. We intended to report our results neutrally and we did not mean to imply that such a wet departure is by definition unacceptable. We will add this point of low absolute changes in the limitations: "The wet departures in very dry regions such as the Sahara, as observed in Figs. 4 and 6, indicate that the soil moisture in those regions is expected to be permanently higher than the PiControl baseline according to our analysis based on relative change. However, the absolute changes in soil moisture are of rather low magnitudes and the implications for such regions could be rather limited."

3. Also, some regions show contrasting wetting and drying signals for different scenarios, which shows a high regional uncertainty according to ESM, which makes

the results less reliable. It seems reasonable to add an analysis to the results by latitude or by representative land type.

We agree that convergence of ESMs projections intuitively increases confidence in model projections and that conflicting model outcomes reduce that confidence regionally. However, this is not the full story. Jebeile & Barberousse (2021) wrote that model spread is indeed an indication of models' uncertainty, but should not only be considered as the errors made in the modeling assumptions. The IPCC regards model spread as something that merely reflects the quantification of previously unmeasured sources of uncertainty (Stocker and Qin, 2013, IPCCFAQ 1.1). According to Jebeile & Barberousse (2021), regarding ESMs ensembles, convergence of projections has lower priority than model independence, which is a prerequisite for the robustness of models' core hypotheses. Independence may not come from detrimental dissensus among ESMs that undermine confidence, but from different yet equally valid hypotheses. Moreover, ensemble means tend to be more accurate than projections from individual models, because of independence among ESMs that stems from divergence among ESMs (Reichler & Kim, 2008). Therefore, model spread is not necessarily detrimental to climate impact assessments.

4. Regarding total soil moisture analysis using different ESMs in CMIP6, future scenario results have forcing and ESM dependency issues. Therefore, in order to derive general results, it seems necessary to understand and explain how the amount of total soil moisture changes in terms of precipitation and run off in terms of water balance. In this study, a detailed regional analysis of dry and wet conditions was presented in detail, but explanations for the reasons for the results are considered insufficient. A scientific understanding would be better if given an additional explanation of energy balance or water balance for the variation of soil moisture.

We understand that soil moisture data depends on different ESMs and their forcings. However, as mentioned in the previous part, the model spread in the ESMs also shows that there is model independence, which is not necessarily detrimental for a more accurate ensemble mean. Drying and wetting may be the result of different combinations of changes in the water balance terms precipitation, runoff and evaporation. We agree that explanations for the reasons behind the changes would give the reader a more comprehensive picture about the impact of climate change on soil moisture. However, this may also be regionally dependent and we hope it is understood that a detailed analysis of all regions is not feasible in this

paper. We intend to add/merge the text below to a revised manuscript at the end of Section 3.4:

“Drying and wetting of soils may be the result of different combinations of changes in the water balance terms precipitation, runoff and evaporation. We did not provide a quantitative analysis of each of these terms. However, in general it can be noted the total changes in soil moisture content are dominated by precipitation changes, while the drying of surface soil moisture is consistent with enhanced evaporative demand (Berg et al., 2017). Dirmeyer et al. (2016) also showed that the top 10 cm of soil moisture changes correlate well with precipitation changes (Dirmeyer et al., 2016), although drying of soil moisture also happens despite increased precipitation in mid- and high-latitudes in summer. Cook et al. (2020), who also looked at the top 10 cm soil moisture, showed a few regions (e.g., extra-tropical South America, northern and eastern Africa, India, and Central Asia) with robust increases in annual soil moisture that are consistent with areas that will experience the strongest increases in precipitation. However, they reported that drying in the total column soil moisture is spatially more widespread compared to precipitation and runoff. The drying appears in regions where precipitation is increasing (e.g. northern and eastern Europe). These differences are the result of greater evaporative demand (Dai et al., 2018; Mankin et al., 2019). Regarding the root zone soil moisture changes in our study it makes sense to assume that precipitation changes are the dominant driving mechanism.”

5. This study result presents the land surface area with a wet departure is projected to be larger than that with a dry departure for SSP scenarios. As mentioned, this result was confirmed by Dirmeyer et al. (2016), it is different from the contents of drier soil condition are more globally prevalent, and it is explained that the influence of vegetation is large when using total soil moisture. According to Dirmeyer et al. (2016), a seasonal difference was also reported that JJA became drier in summer but wet in winter. In this study, it seems necessary to include a discussion that reflects the seasonal cycle, and further explanation is needed on whether the results are robust in terms of annual mean calculation and how the effect of vegetation on total soil moisture is reflected in the results in detail.

We are not 100% certain that we understand the point of the referee. We think the referee may refer to the fact that wet departures in winter and dry departures in summer could cancel each other out. In fact we have also considered this possibility and hence we based much of our analysis on monthly data. So, for example, in

Figures 6-8 any region can have months with both permanent wet and dry departures and, if so, these results are visualized as such. The plots in Figs. C1 and C2 below show the percentage of regions around the latitudes, 60°N, 40°N, 20°N, 0°, 20°S, and 40°S, with conflicting departure signals among ESMs. The percentage of regions with conflicting departure signals globally is 33% for SSP370, and 37% for SSP126. Most conflicting signals are at higher northern latitudes. Similar phenomenon (i.e. larger spread) has been observed since CMIP5 (Berg et al., 2017). This discussion will be added into the Limitations section of the revised manuscript, and the Figs. C1 and C2 will be added to the Supplement.

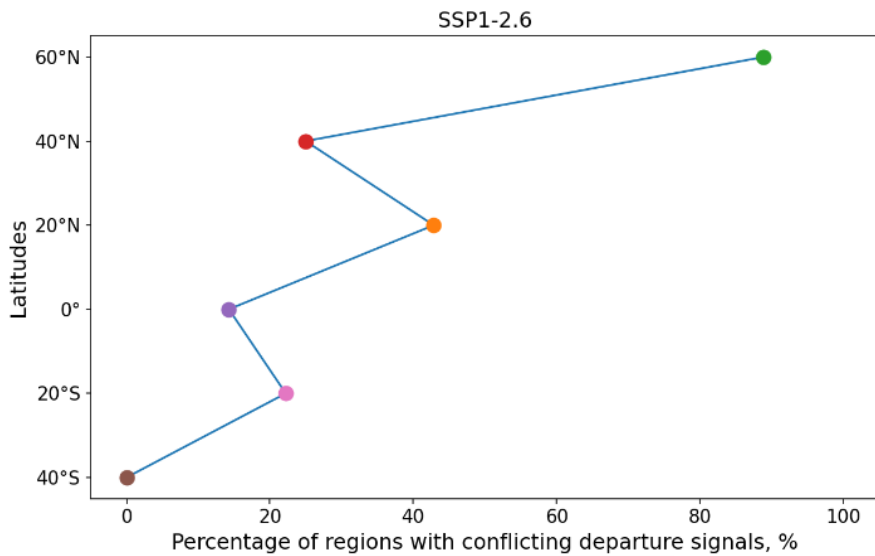

Figure C1. Percentage of regions that show conflicting wet and dry departure signals among ESMs around different latitudes.

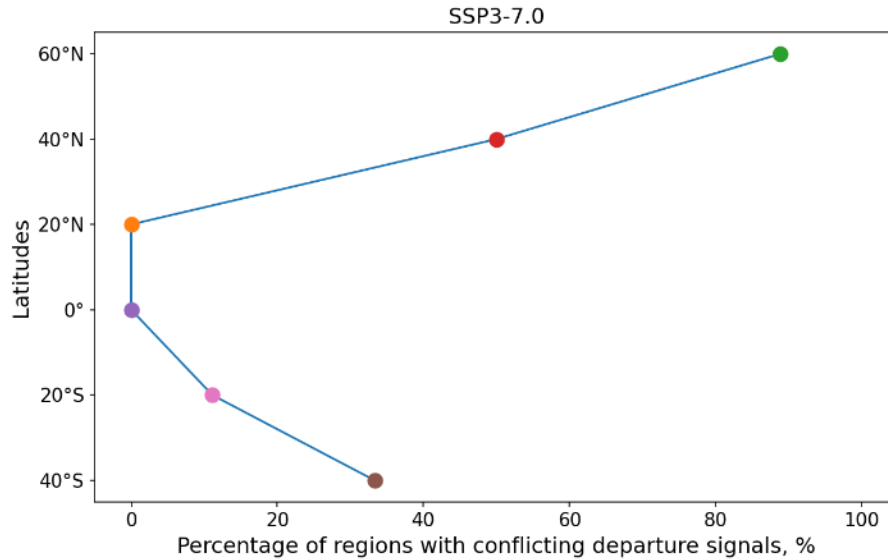

Figure C2. As in Fig. C1 but for SSP3-7.0

Figures C3 and C4 below compare the seasonal mean land area with permanent wet and dry departures in boreal summer (June-July-August, JJA) and boreal winter (December-January-February, DJF) for SSP1-2.6 and SSP3-7.0. For SSP3-7.0, the land area with permanent wet and dry departures in boreal summer is similar. However, the land area with wet departures is significantly larger than dry departures in boreal winter. This analysis will be added to the manuscript under the Result and Discussion section along with seasonal plots (analysis in progress) that illustrate the regions of wet and dry departures in different seasons at the end of the 21st century.

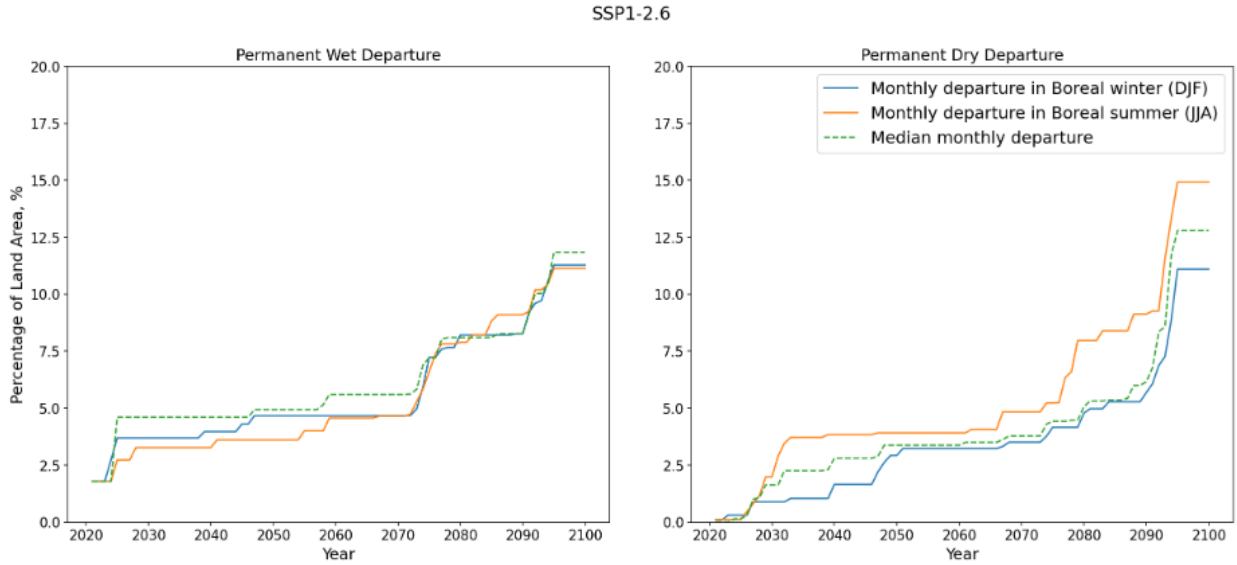

Figure C3. Land area with permanent departures for months DJF and JJA in SSP1-2.6. The median monthly departure is the median of all 12 months.

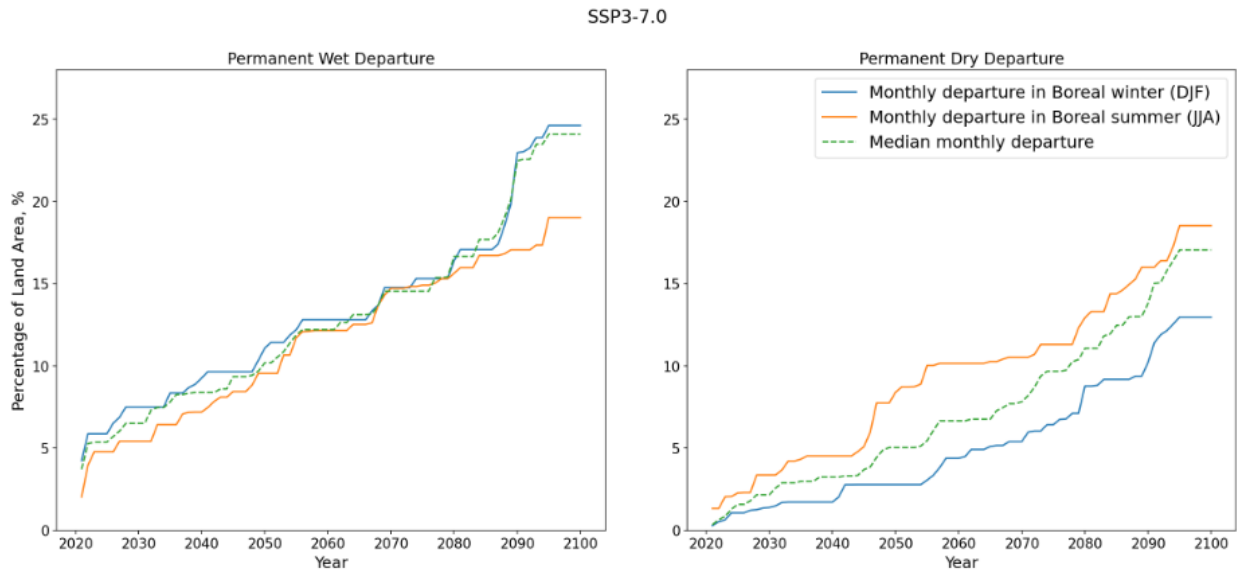

Figure C4. As in Fig. C3 but for SSP3-7.0.

The two figures (Figs. C5 and C6) below show the differences between the land area with permanent departure of soil moisture for each month in SSP3-7.0. Each solid line represents the ensemble median of a particular month. The red thick dotted line shows the median. These figures will be added to the revised Supplement along with similar figures for other SSP scenarios.



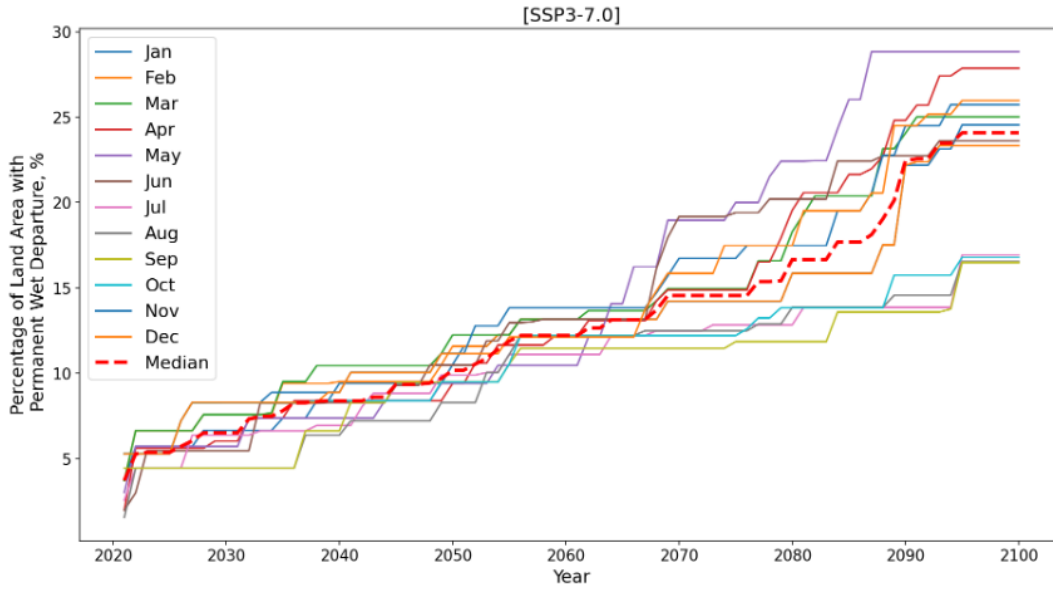

Figure C5. Land area with permanent wet departure of soil moisture in SSP3-7.0 based on monthly analysis.

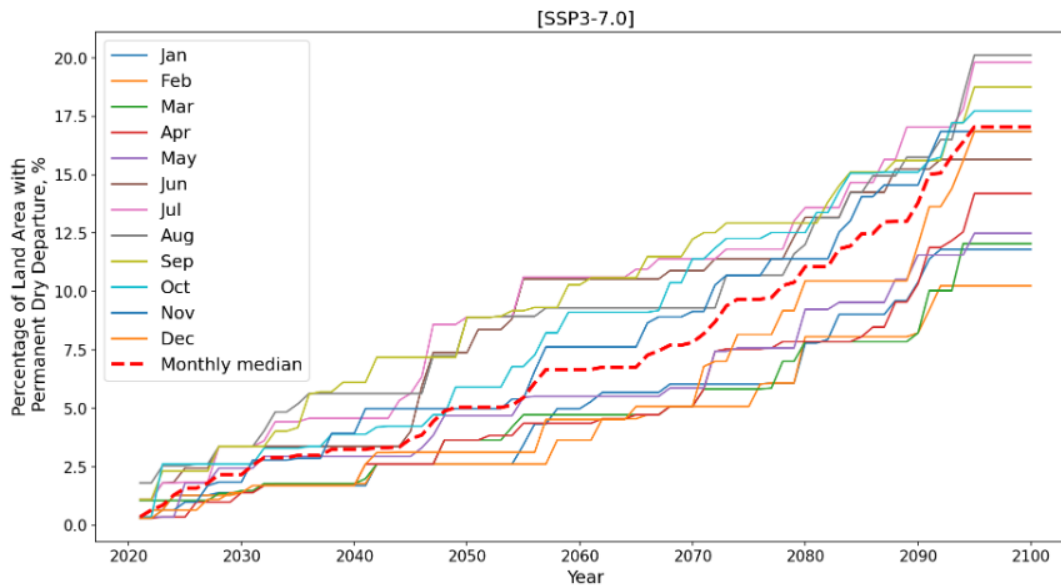

Figure C6. As in Fig. C5 but for dry departure.

Although our analysis on permanent departures indicate that a larger land area is predicted to have permanent wet departures, our first analysis, that investigates the difference between the yearly mean soil moisture content from 2071 to 2100 in different SSP scenarios and that of the PiControl scenario, suggests that more regions will become drier rather than wetter in higher warming scenarios (as shown in Fig. 7 below). However, this drying trend may not be permanent or may become permanent at a later time,

according to our definition of time of emergence, compared to the wet departure. Therefore, the land area analysis detects a smaller land area with permanent dry departures than permanent wet departures.

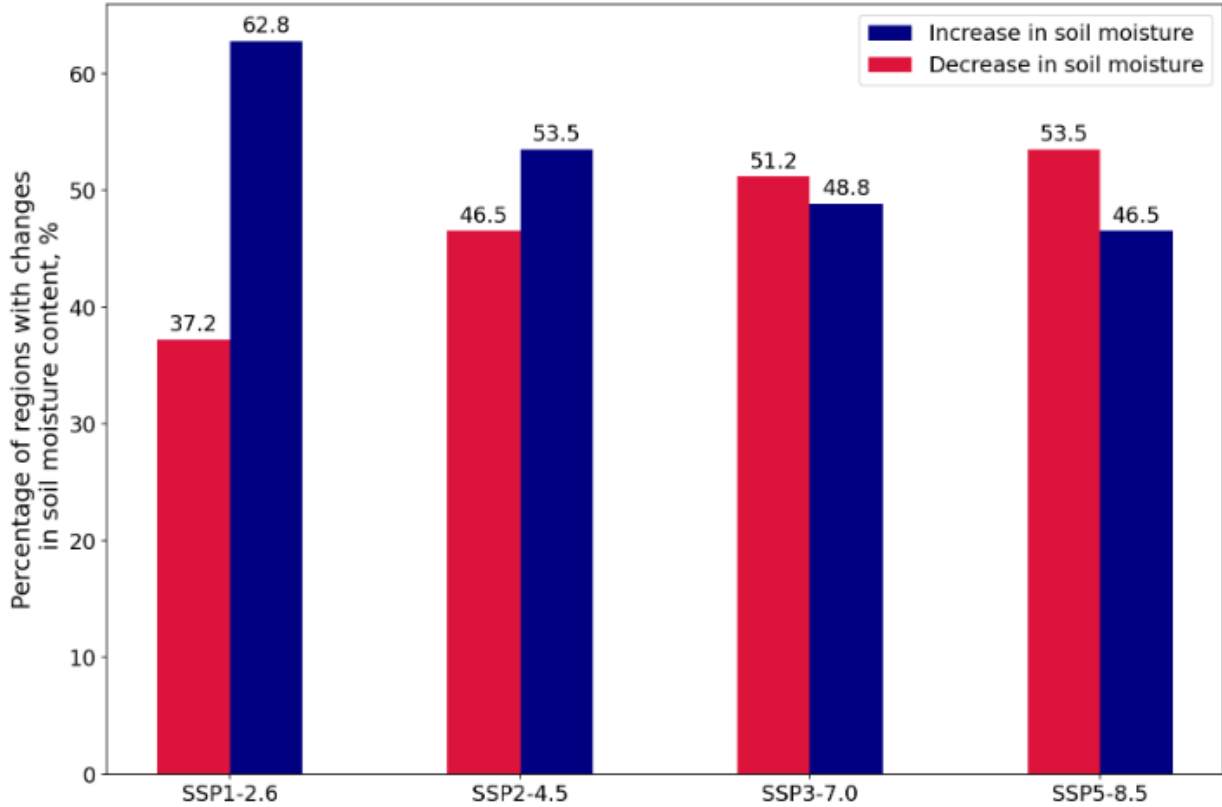

Figure C7. Percentages of regions with deviation in soil moisture contents in different climate scenarios during 2071-2100 from the PiControl baseline.

In our analysis for land areas with permanent departures, the results are reported as ensemble medians. Figure C8 below shows the difference between mean and median land area with permanent departures for SSP1-2.6 and SSP3-7.0. If the results are reported in mean, the difference between land area with wet and dry departures is smaller. However, when we looked at the results individually, there could be outliers, in this case the model CNRM-ESM2-1 that reports a much higher dry departures than the others. Therefore, we think the median is a statistically more robust result and showing the ensemble median remains our choice for the main manuscript. The difference between mean and media will be added to the supplement.

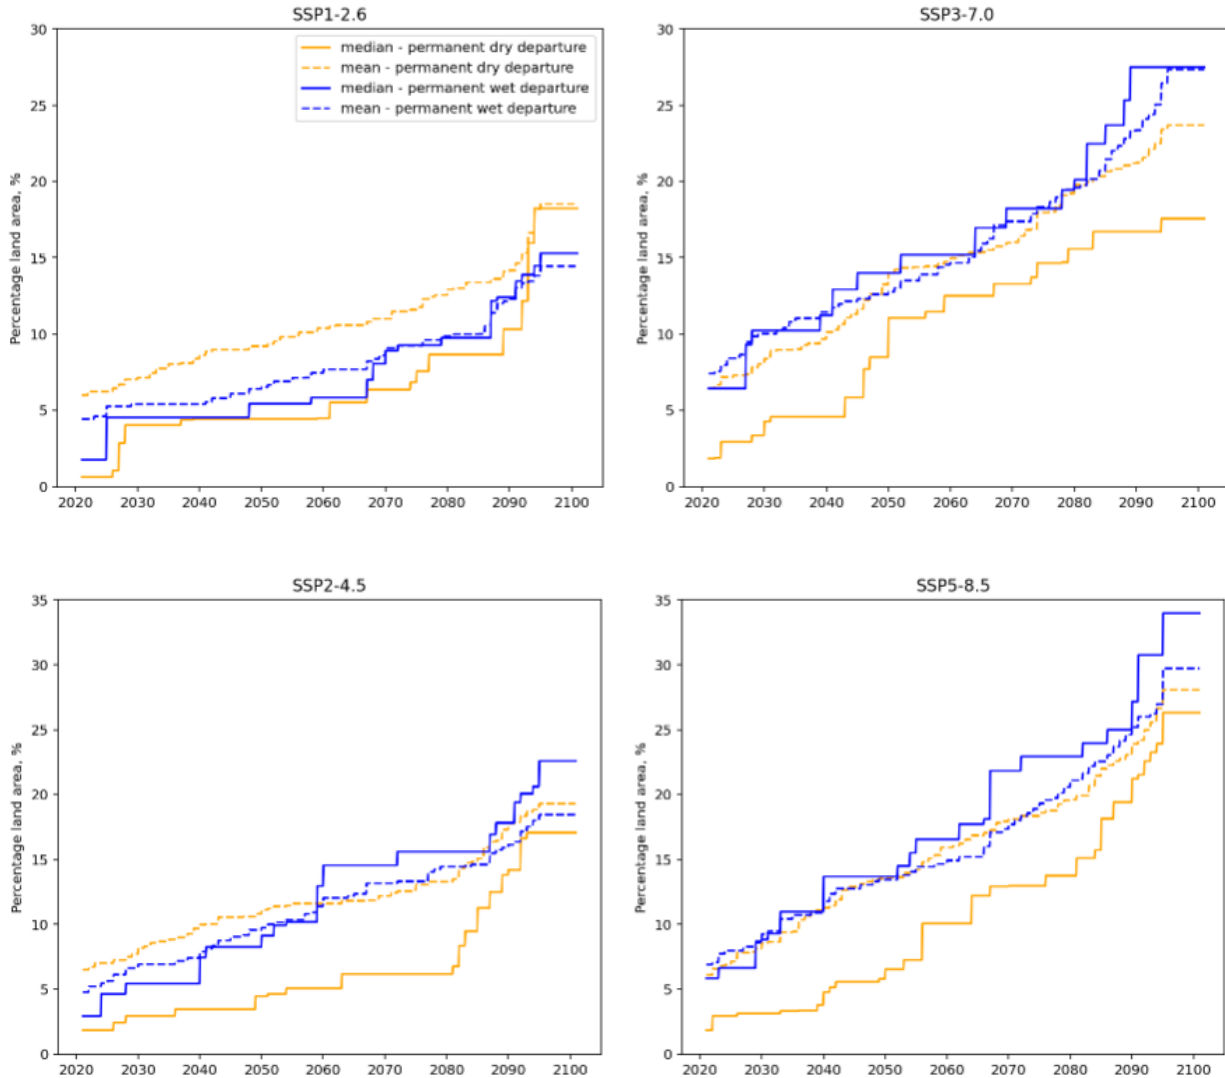

Figure C8. The differences between mean and median land area with permanent departures for SSP1-2.6.

**Minor Comments:**

- This study analyzed 14 selected ESM, it is need to provide additional explanation of 14 selected model for brief introduction to the version and characteristics of the land model is each ESM and the number of ensemble members in part 2.1(data)

The 14 ESMs were selected based on their completeness and the availability of the needed soil moisture content data at the beginning of our study, which was in November 2021, after which we did not change the models but did update our analyses according to changes in the data in our selected model up until June 2022.

These 14 models have the soil moisture data of all of the four SSP scenarios and piControl simulation that fits the studied timeframe, which is 2021-2100.

In Section 2.1 we stated our rationale: “We used data from all ESMs that had both the PiControl as well as all four SSPs of interest available as of 25 June 2022 (ESGF, 2022) which amounted to 14 models.” To be more precise, we will change this to “We used data from all ESMs that had both the PiControl as well as all four SSPs of interest available on the ESGF servers as of 1 November 2021, which amounted to 14 models. We analyzed the output from these models as reported on 25 June 2022 (ESGF, 2022)”

We will additionally add a table in the Supplement and list the ensemble member numbers in this Table and, if applicable, a link to the model web page for more detail. We will add an additional sentence: “We used data ... to 14 models. Detailed information on these models can be found from the references provided in Table S1”

7. how about displaying the remaining 10 models in figure 2 for 80-year average values of the regional monthly total soil moisture content from PiControl scenario as supplements?

We agree, and in fact 80-year average values of the regional monthly total soil moisture content from PiControl scenario are already in Figure S2 of the supplement. There was a mistake in the Figure S2 caption, it should have been “80-year average.”

8. In this study, analysis results for future SSP scenarios of 14 ESM in CMIP6 were provided. It seems necessary to find out what the reliability of the results of each model scenario run is, supplementary explanations on land variable performance in historical runs, or what has been reported in previous studies.

We understand this question, but in fact this is not at all straightforward. Total soil moisture or root zone soil moisture patterns are hard to verify. Even if surface soil moisture is difficult as measurements over dense vegetation are flagged as poor quality and, moreover, the surface soil moisture patterns do not even have to coincide with root zone soil moisture. We believe that 14 models should give a reasonable estimate of the model spread and associated uncertainty.

## Response to Referee 2 Wolfgang Wagner

With great interest I read this paper and its successor paper (Wang-Erlandsson et al. 2022) that proposed to consider the root-zone soil moisture content for determining the green water planetary boundary, namely by computing the percentage of ice-free land area on which root-zone soil moisture deviates from Holocene variability for any month of the year. I find this new concept very convincing and well justified from an Earth system perspective. Furthermore, conceptually, it is quite simple which helps in the implementation and interpretation of the results. The major uncertainty comes from the quality of the input soil moisture data sets, which unfortunately is not known for the long time periods considered. Having said that I find the scenarios computed from the multi-model ensemble (14 models from CMIP6) for the four pathways (SSP1-2.6, SSP2-4.5, SSP3-7.0, SSP5-8.5) plausible, even though I remain sceptical about the finding that there may be more pronounced wetting than drying trends. E.g. can we really expect to see more soil moisture in the Sahara? Questions like these could e.g. be addressed by confronting the land surface components of the different ESMs with remotely sensed soil moisture data. But I understand that this is outside the scope of this paper. Overall, the paper is very well written and clear. Limitations are also discussed. So, in short, I recommend publishing the paper after having addressed the comments of reviewer #1.

We thank the referee for such positive comments. We would like to respond to the point of the referee remaining skeptical about finding more wetting than drying trends. Partly this may of course be caused by errors in the ESMs as the referee also seems to suggest, however, partly this may also simply be caused by the fact that:

- we looked at relative instead of absolute changes (see response to point 2, ref#1).
- General changes show more drying than permanent departures (point 5, ref#1, Fig. C7).
- Moreover, in our response to point 5, ref#1, it became apparent that the differences between wetting and drying are less pronounced when looking at the ensemble means instead of the medians (Fig. C8).

## Response to Referee 3

The article analyses root-zone soil moisture changes under various climate scenarios. By 2050, more than 25 % of global land may experience permanent shifts in soil moisture beyond pre-industrial variability. The paper presents a solid analysis and is well written and structured. I particularly like the limitations section.

We thank the referee for the positive and constructive comments.

### Major comments:

1. No information is provided on the model selection. Some justification is necessary on why were these 14 models selected from the around 65 models that are available in the CMIP6 archive.

Please see our response to point 6, ref#1.

2. Many CMIP6 models respond too strongly to increasing atmospheric CO<sub>2</sub> (i.e., they are too sensitive). The CanESM5 and UKESM1-0-LL models included in the study are two prime examples of this. EC-Earth3 and IPSL-CM6A-LR also run a little hot. Perhaps it would be good to discuss the implications of this in the limitations section.

We will look into relevant literature on this issue and discuss implications in the limitations section in a revised manuscript.

3. The code is not available at the provided link (<https://github.com/enninglai/Departure-of-soil-moisture-content-from-the-Preindustrial-Baseline>). This should be resolved prior to publication of the final paper.

We are sorry to hear that the link did not work. However, when we double-checked it, the link did work for us. Upon acceptance, we will issue a persistent identifier for this repository with Zenodo that should definitely solve any problems.

### Minor comments:

4. Title: consider replacing "as early as 2050" with "by 2050" to make the title more concise.

This change would make the title more concise, however, after consideration, we still prefer "as early as" as it gives more sense of urgency.

5. Figure 7: Why are some regions not shown? Is it possible to show all regions?

We had originally included all regions, but the editor advised us to reduce the number of regions as the figure was not that clear. The full figures and tables with all regions can, however, be found in the supplement as was already indicated in the caption of Fig. 7. We did note, however, an error in the caption, because panel (b) actually refers to all regions, which we will correct.

## References (that were not yet part of the manuscript)

Berg, A., Sheffield, J., and Milly, P. C. D. (2017), Divergent surface and total soil moisture projections under global warming, *Geophys. Res. Lett.*, 44, 236– 244, doi:10.1002/2016GL071921.

Dai, A., Zhao, T. & Chen, J. Climate Change and Drought: a Precipitation and Evaporation Perspective. *Curr Clim Change Rep* 4, 301–312 (2018).  
<https://doi.org/10.1007/s40641-018-0101-6>

Hausfather, Z. and Peters, G. P.: Emissions – the ‘business as usual’ story is misleading, 577, 618–620, <https://doi.org/10.1038/d41586-020-00177-3>, 2020.

Jebeile, J., Barberousse, A. Model spread and progress in climate modelling. *Euro Jnl Phil Sci* 11, 66 (2021). <https://doi.org/10.1007/s13194-021-00387-0>

Mankin, J. S., Seager, R., Smerdon, J. E., Cook, B. I., & Williams, A. P. (2019). Mid-latitude freshwater availability reduced by projected vegetation responses to climate change. *Nature Geoscience*, 12(12), 983–988. <https://doi.org/10.1038/s41561-019-0480-x>

Reichler, T., & Kim, J. (2008). How well do coupled models simulate today's climate? *Bulletin of the American Meteorological Society*, 89, 303–312.

Stocker, T., Qin, D., Plattner G-K., Tignor M., Allen S., Boschung J., Nauels A., Xia Y., Bex V., and Midgley P. (Eds.). (2013). IPCCFAQ 1.1: If understanding of the climate system has increased, why hasn't the range of temperature projections been reduced?. *Climate change 2013: The physical science basis: summary for policymakers, technical summary and frequently asked questions*. WMO, UNEP.
